# Supplementary material
Source: PubMed Central journal article supplement (PMC3048693)
Supplement: supp_M110.178772_jbc.M110.178772-1.pdf [file supp_M110.178772_jbc.M110.178772-1.pdf]

# SONIC HEDGEHOG INDUCED PROLIFERATION REQUIRES SPECIFIC G-ALPHA-INHIBITORY PROTEINS

Mercedes Barzi<sup>1</sup>, Dorota Kostrz<sup>1</sup>, Anghara Menendez<sup>1</sup> and Sebastian Pons<sup>1</sup>

## LEGENDS FOR SUPPLEMENTARY FIGURES

Supplementary Fig 1. (A) Shh-induced proliferation of CGNPs is strongly enhanced by the active forms of members of the G $\alpha$ i/o class. CGNPs cells were plated in a saturating concentration of Shh (3  $\mu$ g/ml) and transfected with different active mutant forms of G $\alpha$  cloned into pCIG, a nuclear GFP expressing bicistronic vector. After 24 hours, cells were washed, treated for 48 additional hours with the indicated amounts of Shh, and proliferation was analyzed through H3-Thymidin incorporation. (B) Effect of different wild-type G $\alpha$  proteins expression on Shh induced proliferation. CGNPs cultures treated as above, were transfected with different wild type G $\alpha$  proteins and 48 h later proliferation measured by BrdU incorporation. (C) CGNPs cultures were transfected with either empty vector (pGHIN), or pGHIN expressing shRNAs directed against G $\alpha$ i2 and G $\alpha$ i3 (Gi2UTR2 and Gi3UTR2). The proliferation induced by different amounts of Shh was measured 48 later by H3-Thymidin incorporation.

Supplementary Fig 2. Representative images of cells transfected with Gi1UTR3, Gi2UTR2 or Gi3UTR3. Representative photos of cells transfected with the most efficient shRNA constructs for G $\alpha$ i1, G $\alpha$ i2 or G $\alpha$ i3. The shRNA expressing constructs were electroporated into freshly isolated CGNPs, grown in a saturating concentration of Shh (3  $\mu$ g/ml) for 48h and the proliferation measured by BrDu incorporation.

Supplementary Fig 3. Representative photos of rescue of proliferation in cells transfected with Gi2UTR2/Gi3UTR3. Freshly isolated CGNPs were electroporated with vectors containing G $\alpha$ i2UTR2/G $\alpha$ i3UTR2 and constructs expressing the active forms of the different G $\alpha$ i class members. Cells were cultured in a saturating concentration of Shh (3  $\mu$ g/ml) for 48h and proliferation measured by BrdU incorporation..

Supplementary Fig 4. (A) Association between Smo and G $\alpha$ is was studied through co-immunoprecipitation assay as previously described (38). Fresh isolated CGNPs were electroporated with pCIG vectors expressing either SmoM2-HA and/or different G $\alpha$ is-FLAG. Cells were cultured with Shh for 48h, lysated in a non denaturing buffer and immunoprecipitated with anti-HA or anti-FLAG antibodies. Western blots developed with these same antibodies failed to show an association between Smo and G $\alpha$ i. (B) Ciliar location of G $\alpha$ i3 was not affected by Shh deprivation. CGNPs were transfected with G $\alpha$ i3QL-FLAG, grown for 48 and Shh starved or not 4h prior fixation. Cilium position and G $\alpha$ i3QL-FLAG were revealed with anti-ACIII (adenylate cyclase III) and anti-FLAG respectively (white arrows). (C) Ciliar location of G $\alpha$ i3QL-FLAG was not affected by SmoM2 co-expression. Freshly isolated CGNPs were electroporated with G $\alpha$ i2QL-FLAG or G $\alpha$ i3QL-FLAG and a 5x excess of either empty vector or SmoM2. Percentage of transfected cells showing either ciliar or non ciliar G $\alpha$ i2QL-FLAG or G $\alpha$ i3QL-FLAG were counted in each case. (D) Smo location at the cilium is not affected by G $\alpha$ i2/G $\alpha$ i3 depletion. CGNPs were electroporated with SmoM2-HA and a 5X excess of either empty vector (pGHIN), or pGHIN expressing shRNAs directed against G $\alpha$ i2 and G $\alpha$ i3 (Gi2UTR2 and Gi3UTR2). SmoM2 and cilium were developed by anti-HA and anti-Acetylated Tubulin staining respectively.

Supplementary Fig 5. G $\alpha$ i1 accumulates in the trans-golgi network. CGNPs were transfected with FLAG-G $\alpha$ i1 and then double-stained with anti-FLAG and anti-ACIII (adenylate cyclase III) or anti-C-PKA (PKA catalytic sub-unit) or anti-TGN38 (a trans-golgi marker). We had previously shown that C-PKA in CGNPs locates at the cilium base surrounding the centrioles. We now observe that G $\alpha$ i1 distributes around the area positive for C-PKA, coincident with the vesicles of the trans-golgi network.
