# Supplementary material
Source: PubMed Central journal article supplement (PMC3048693)
Supplement: supp_M110.178772_jbc.M110.178772-2.pdf [file supp_M110.178772_jbc.M110.178772-2.pdf]

## Supplementary Table 1

| RNAi NAME | TARGETED SEQUENCE         | GENE  |
|-----------|---------------------------|-------|
| Gα1 UTR1  | 5'aaggacctttcgagaaggc 3'  | Gnai1 |
| Gα1 UTR2  | 5'aagatggctcctggagtgtg 3' | Gnai1 |
| Gα1 UTR3  | 5'aatgtcaacccccttacc 3'   | Gnai1 |
| Gα1 UTR4  | 5'aacccccttaccctgattc 3'  | Gnai1 |
| Gα1 CS    | 5'aaggcggccgtggagcgca 3'  | Gnai1 |
| Gα2 UTR1  | 5 aagccctgggcccaggctc 3'  | Gnai2 |
| Gα2 UTR2  | 5 aaccgccgctgcctgctga 3'  | Gnai2 |
| Gα2 UTR3  | 5'aatctaggaaccgccgctg 3'  | Gnai2 |
| Gα2 UTR4  | 5'aagcccacctgctcattct 3'  | Gnai2 |
| Gα2 CS    | 5'aagatcacacagagccccc 3'  | Gnai2 |
| Gα3 UTR1  | 5'aagtcgaggtgctgcattc 3'  | Gnai3 |
| Gα3 UTR2  | 5'aactgctcttgggtacagac 3' | Gnai3 |
| Gα3 UTR3  | 5'aagcagtgacttctgcttac 3' | Gnai3 |
| Gα0 UTR1  | 5'aagcccctgtctaacctac 3'  | Gna0  |
| Gα0 UTR2  | 5'aacctacgaccccagagtg 3'  | Gna0  |

Example showing the primer set used to clone Gai1 UTR1 into HindIII/BglII sites of pSHIN.

| HindIII           | Targeted sequence           | Loop             | R.C. of targeted sequence  | BglII                      |
|-------------------|-----------------------------|------------------|----------------------------|----------------------------|
| 5' <b>GATCCCC</b> | <b>AAGGACCTTTTCGAGAAGGC</b> | <b>TTCAAGAGA</b> | <b>GCCTTCTCGAAAGGTCCTT</b> | <b>TTTTTGGAAA</b> 3'       |
| 3' <b>GGG</b>     | <b>TTCTTGGAAAGCTCTTCCG</b>  | <b>AAGTTCTCT</b> | <b>CGGAAGAGCTTTCCAGGAA</b> | <b>AAAAACCTTTTCTCGA</b> 5' |
