# Supplementary material
Source: PubMed Central journal article supplement (PMC3048693)

# Supplementary Fig 1

**A**

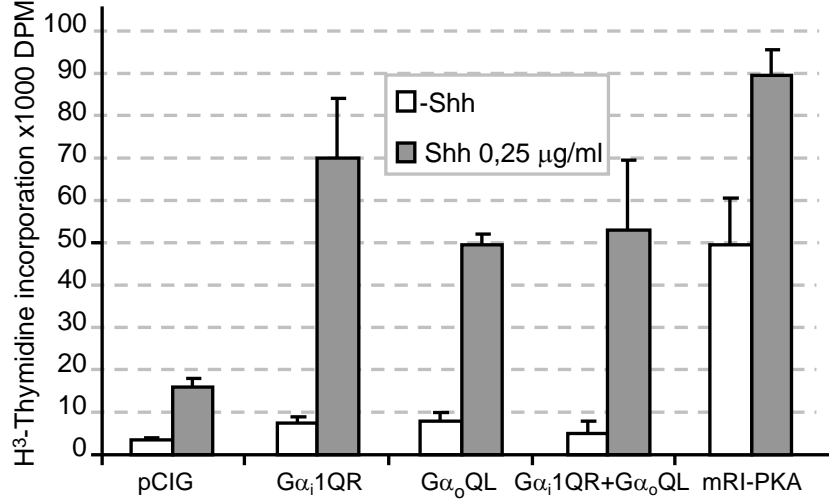

**B**

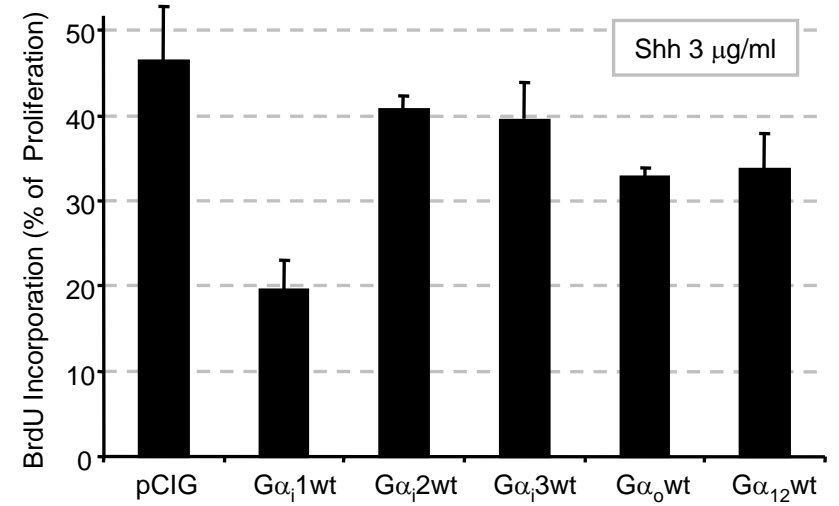

**C**

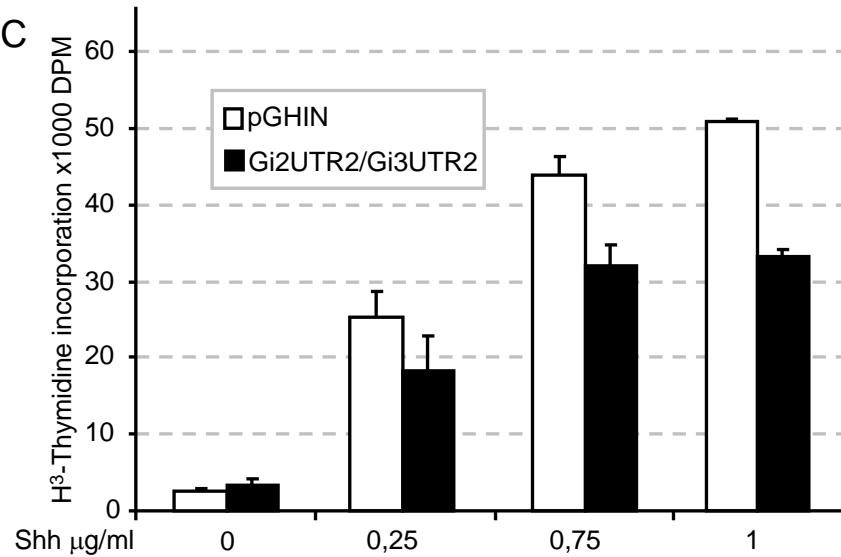

Supplement: supp_M110.178772_jbc.M110.178772-3.pdf [file supp_M110.178772_jbc.M110.178772-3.pdf]

Supplementary Fig 2

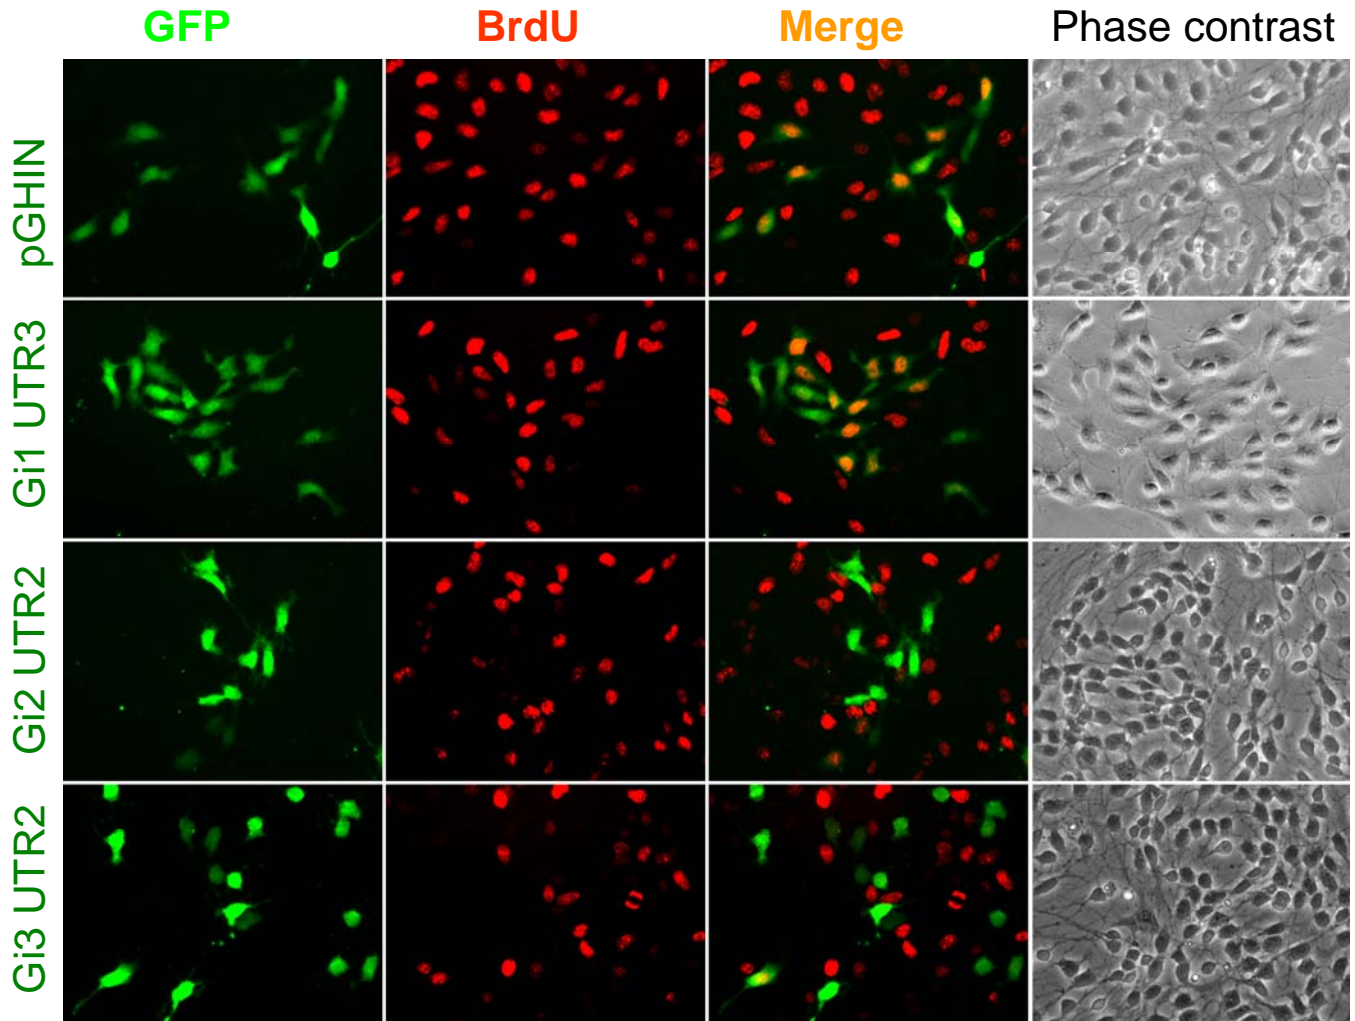

Supplement: supp_M110.178772_jbc.M110.178772-4.pdf [file supp_M110.178772_jbc.M110.178772-4.pdf]

Supplementary Fig 3

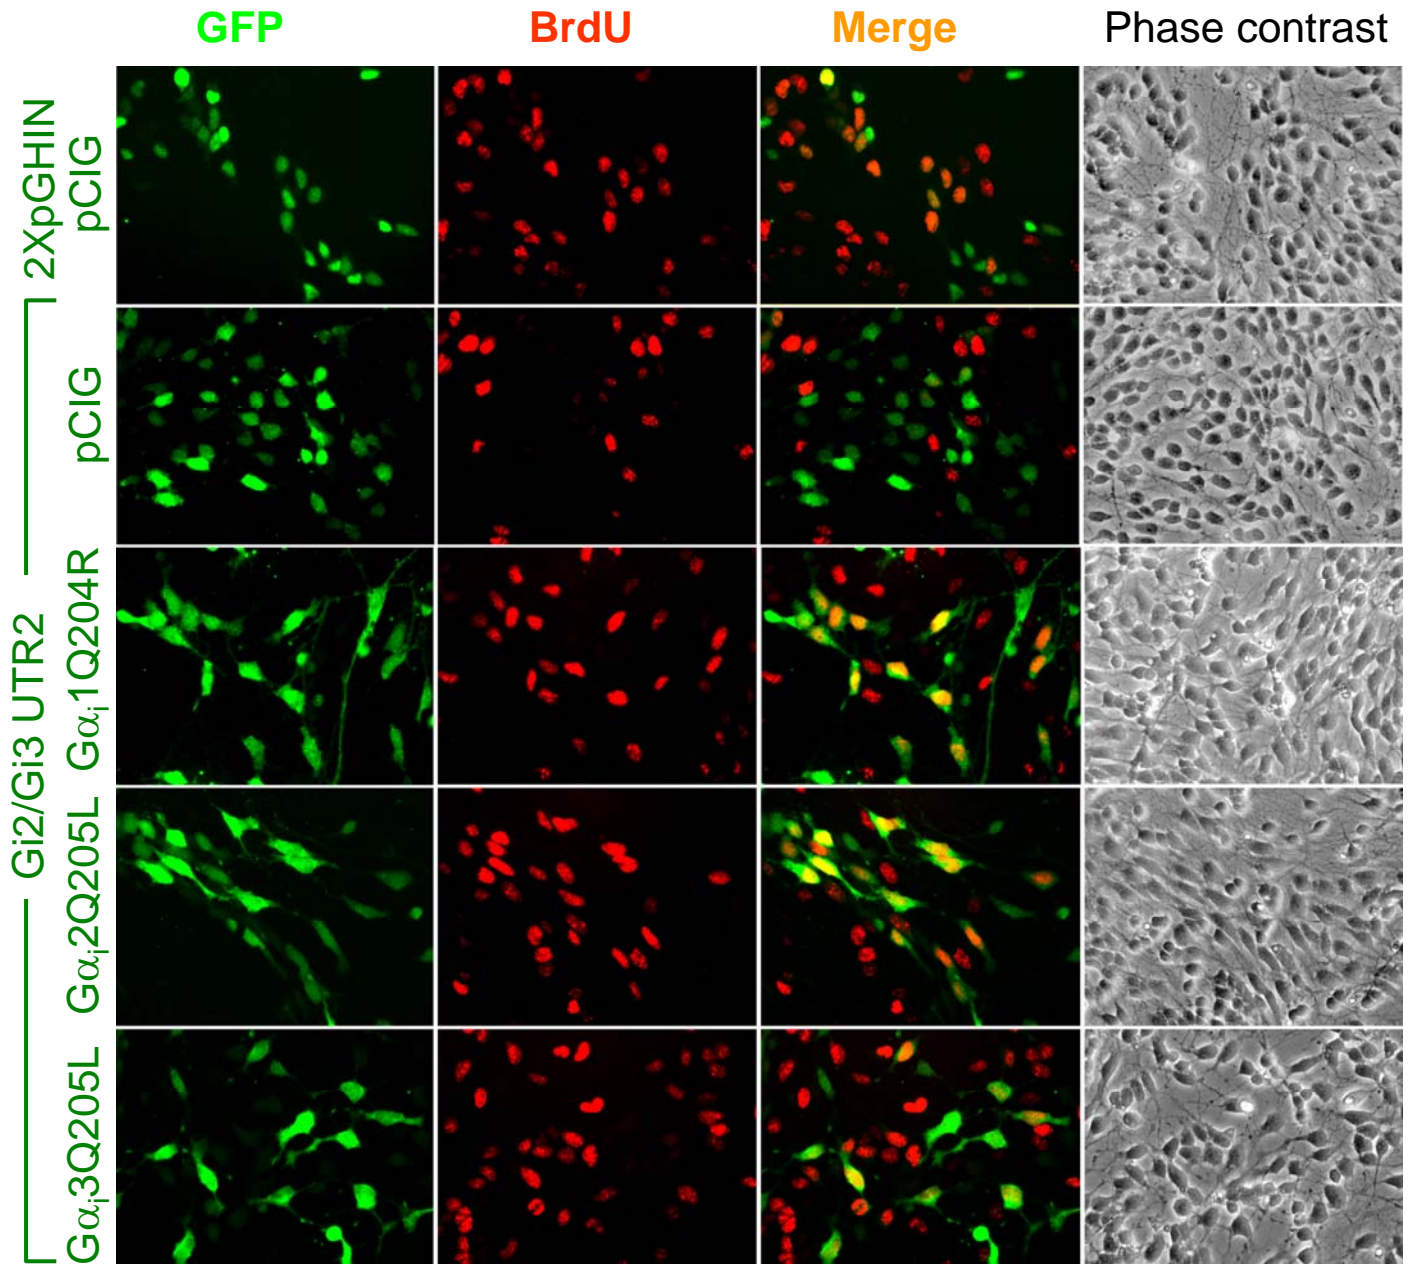

Supplement: supp_M110.178772_jbc.M110.178772-5.pdf [file supp_M110.178772_jbc.M110.178772-5.pdf]

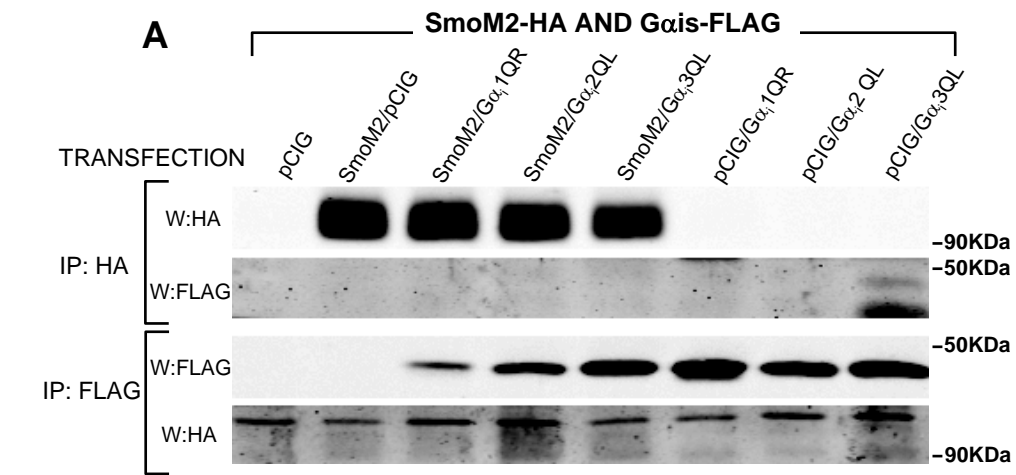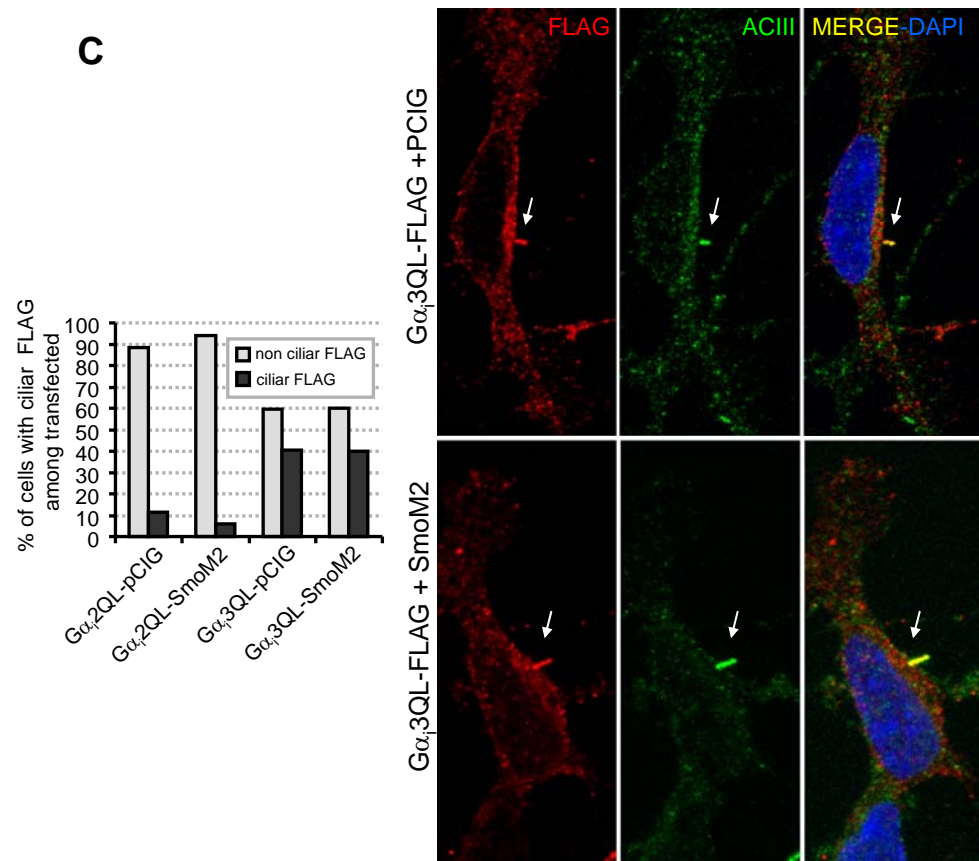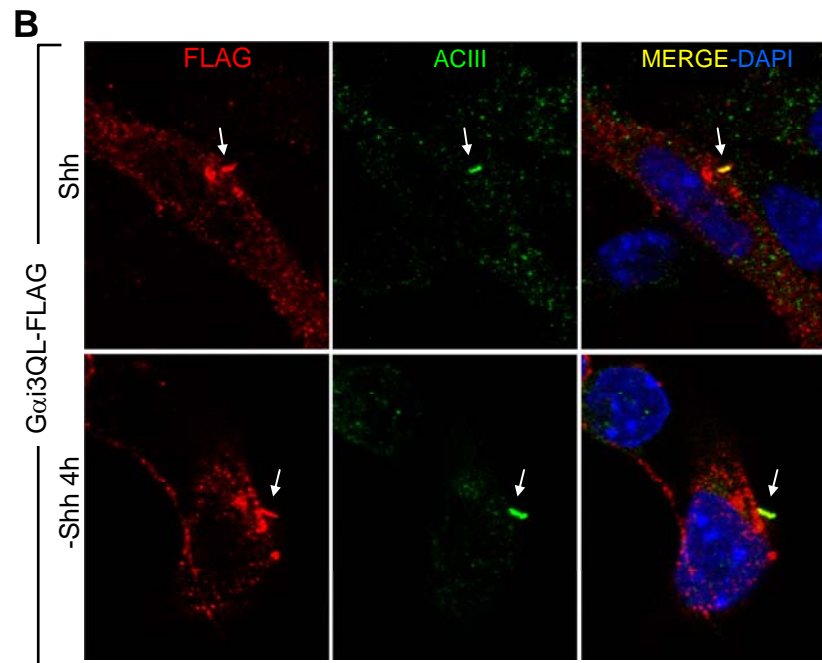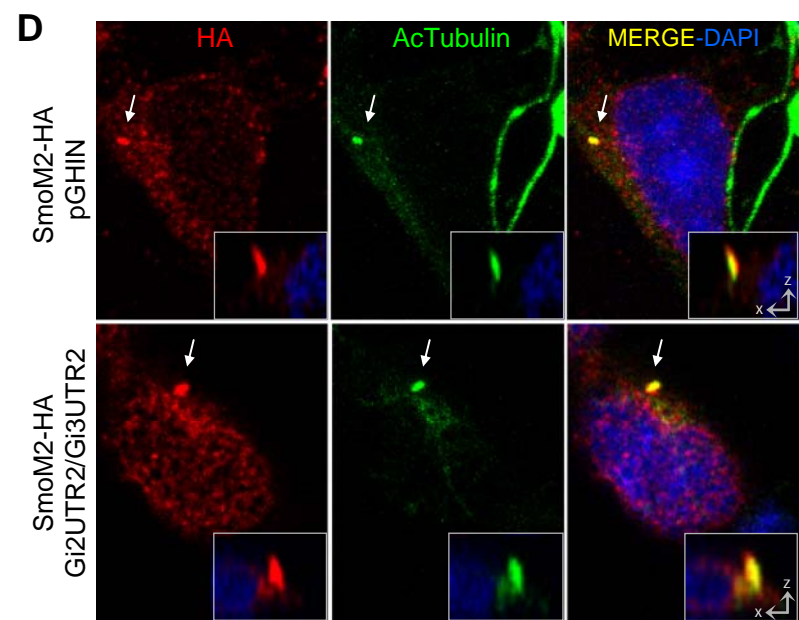

Supplement: supp_M110.178772_jbc.M110.178772-6.pdf [file supp_M110.178772_jbc.M110.178772-6.pdf]

Supplementary Fig 5

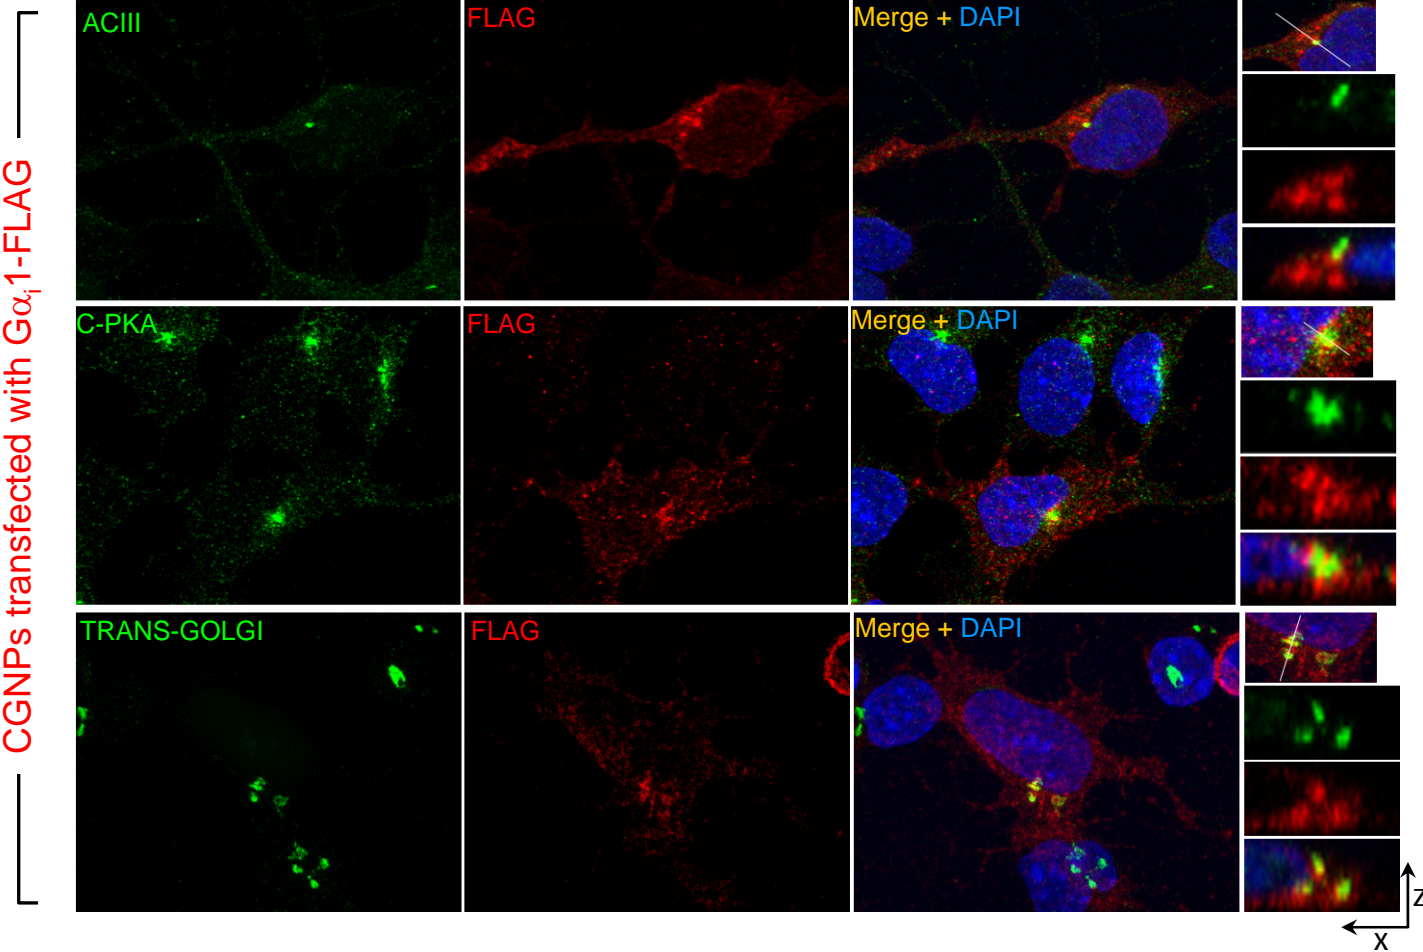

Supplement: supp_M110.178772_jbc.M110.178772-7.pdf [file supp_M110.178772_jbc.M110.178772-7.pdf]
